# Supplementary material
Source: PubMed Central journal article supplement (PMC4972289)
Supplement: supp_pp.16.00680_PP2016-00680DR1_Supplemental_Materialfig1.pdf [file supp_pp.16.00680_PP2016-00680DR1_Supplemental_Materialfig1.pdf]

# Tao et al. Supplemental figure S1

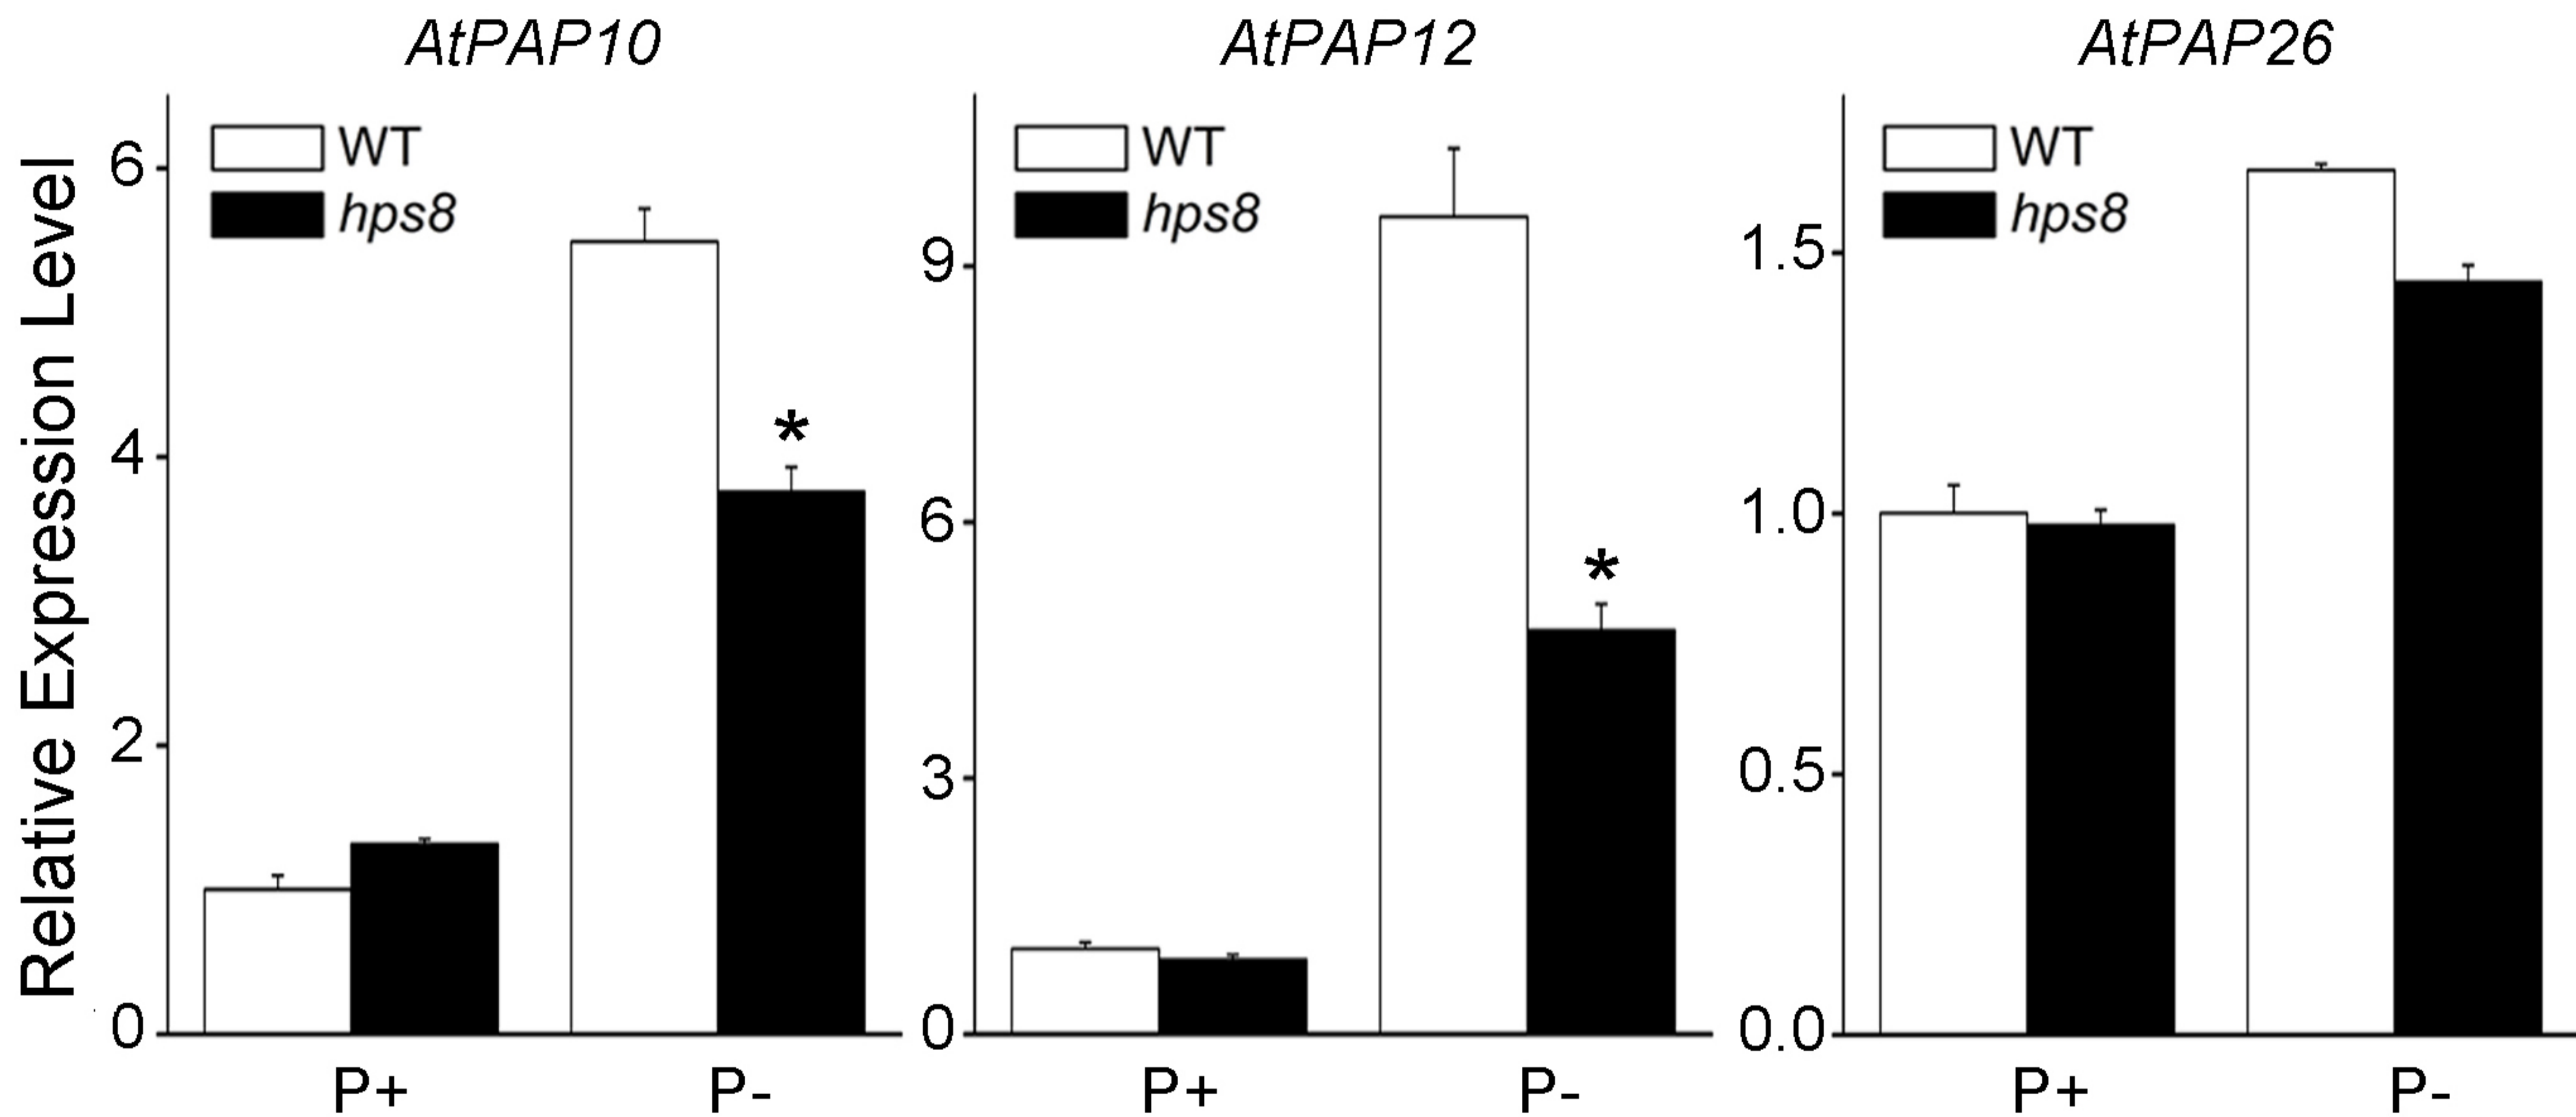

Figure S1. qPCR analysis of relative expression of *AtPAP10*, *AtPAP12* and *AtPAP26* APase genes in roots of the WT and *hps8* seedlings. Values represent means with SE of three replicates. Asterisks indicate significant difference ( $p < 0.05$ ) from the WT according to Student's *t*-test.
