# Supplementary material
Source: PubMed Central journal article supplement (PMC4972289)
Supplement: supp_pp.16.00680_PP2016-00680DR1_Supplemental_Materialfig2.pdf [file supp_pp.16.00680_PP2016-00680DR1_Supplemental_Materialfig2.pdf]

## Tao et al. Supplemental figure S2

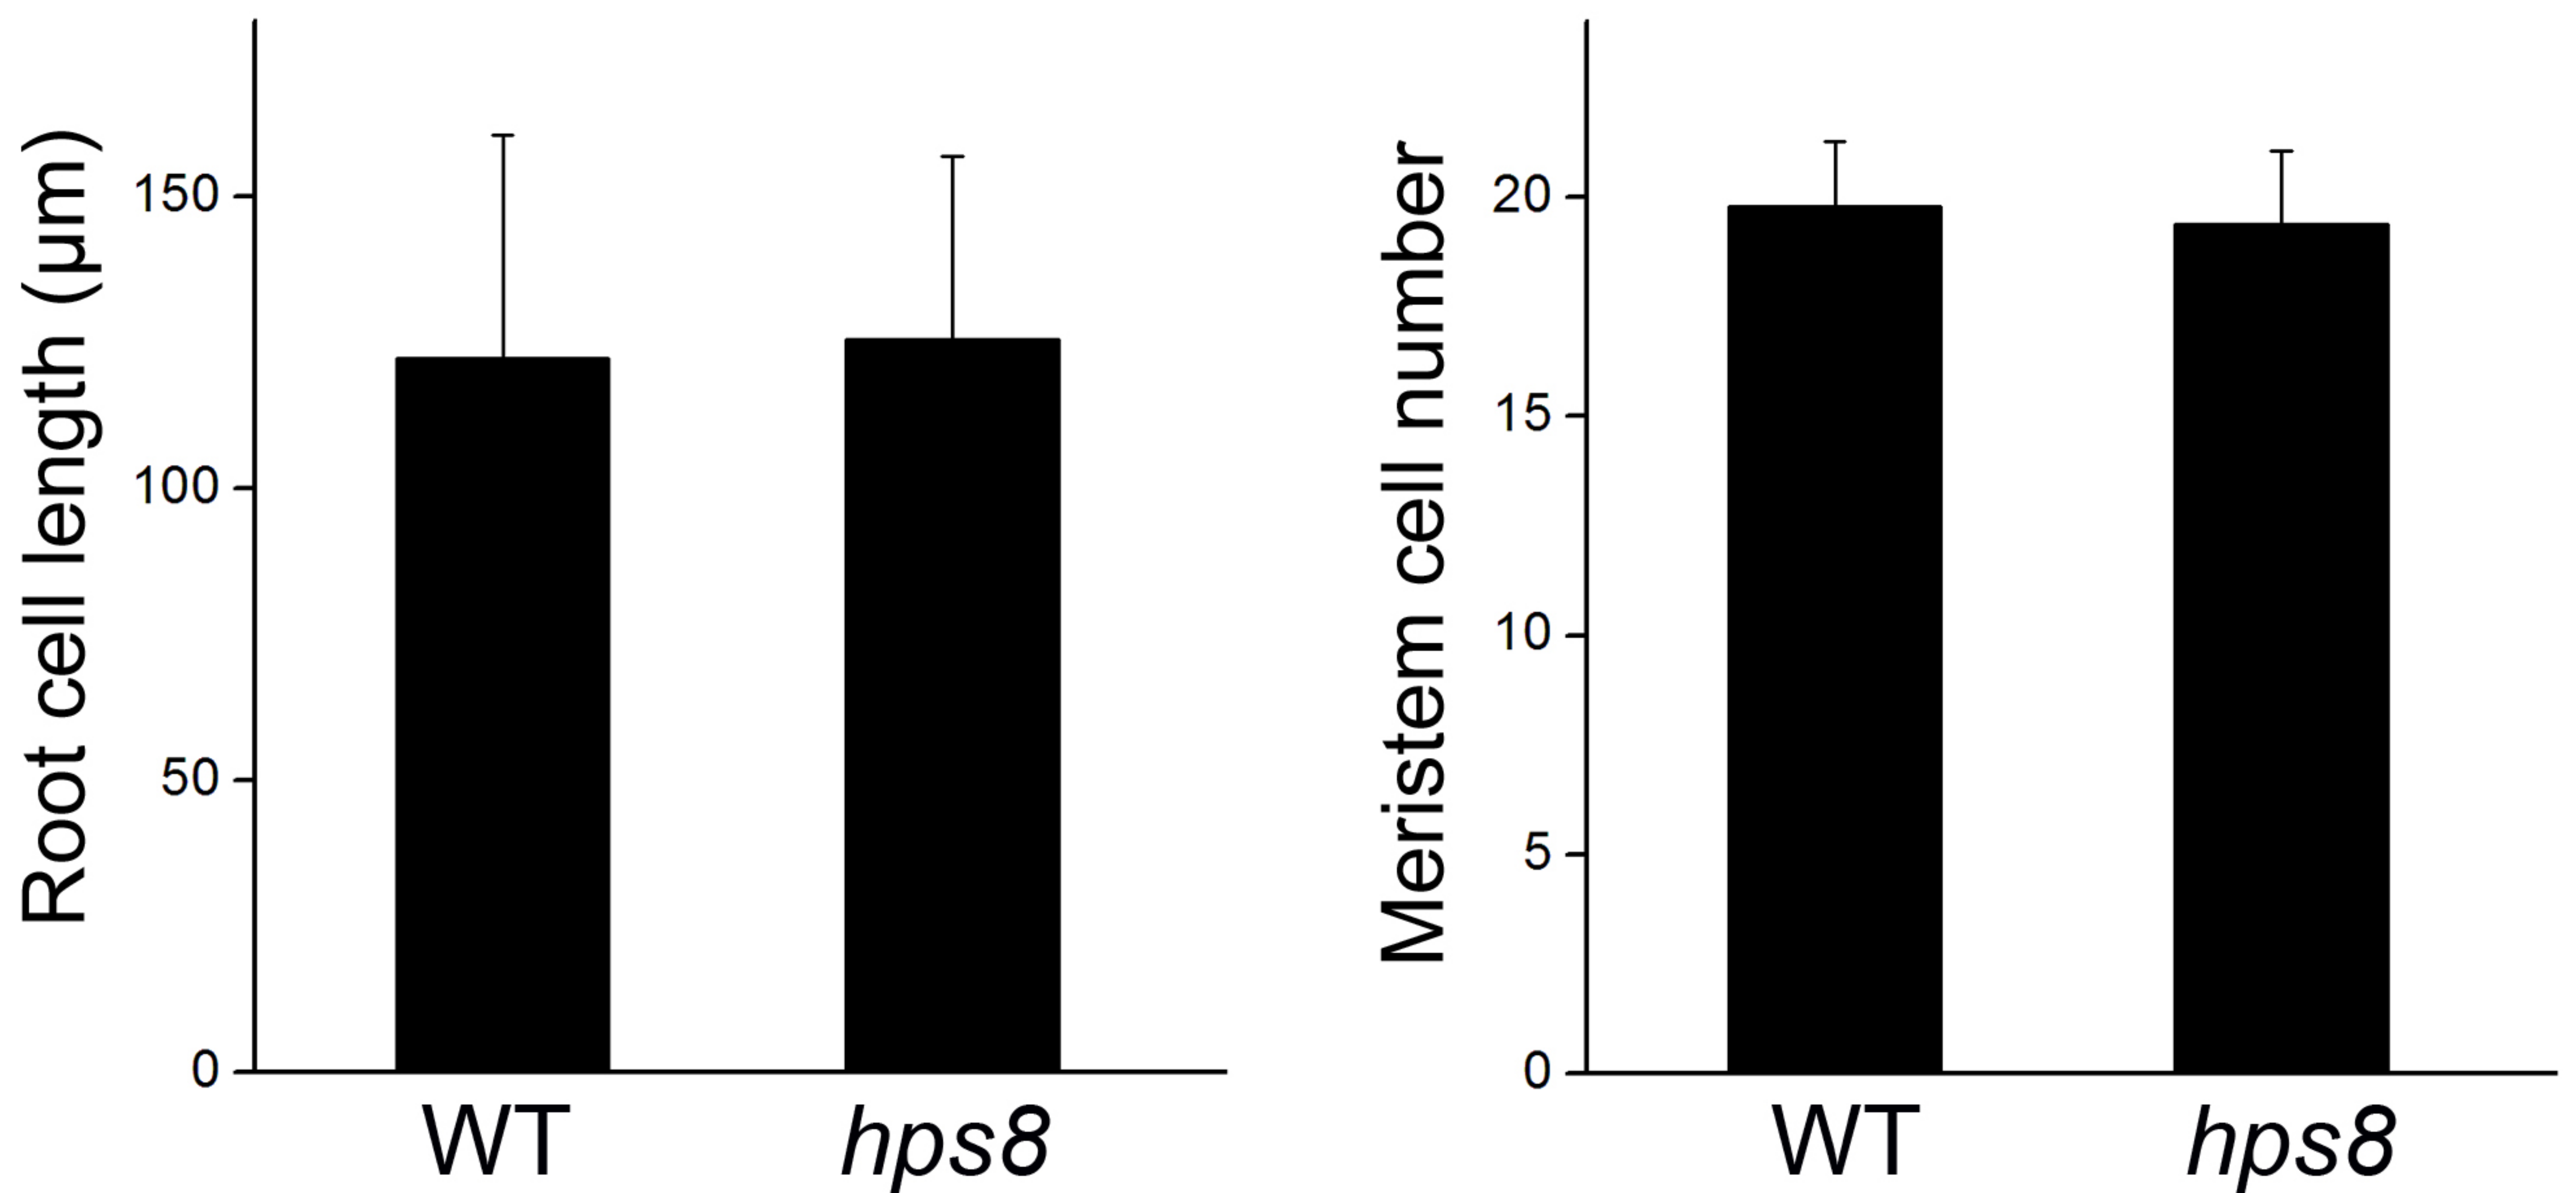

Figure S2. The root cell length and root meristem size of the 8 day-old seedlings of the WT and *hps8* grown under normal growth conditions. For root cell length, the values are the means  $\pm$  SE of 20 seedlings (5 root epidermal cells were measured per seedling). For root meristem size, the number of root meristem was determined by counting the number of cortex cells in a file extending from the quiescent center to the first elongated cell. Values are means  $\pm$  SE ( $n > 20$ ).
