# Supplementary material
Source: PubMed Central journal article supplement (PMC4972289)
Supplement: supp_pp.16.00680_PP2016-00680DR1_Supplemental_Materialfig3.pdf [file supp_pp.16.00680_PP2016-00680DR1_Supplemental_Materialfig3.pdf]

# Tao et al. Supplemental figure S3

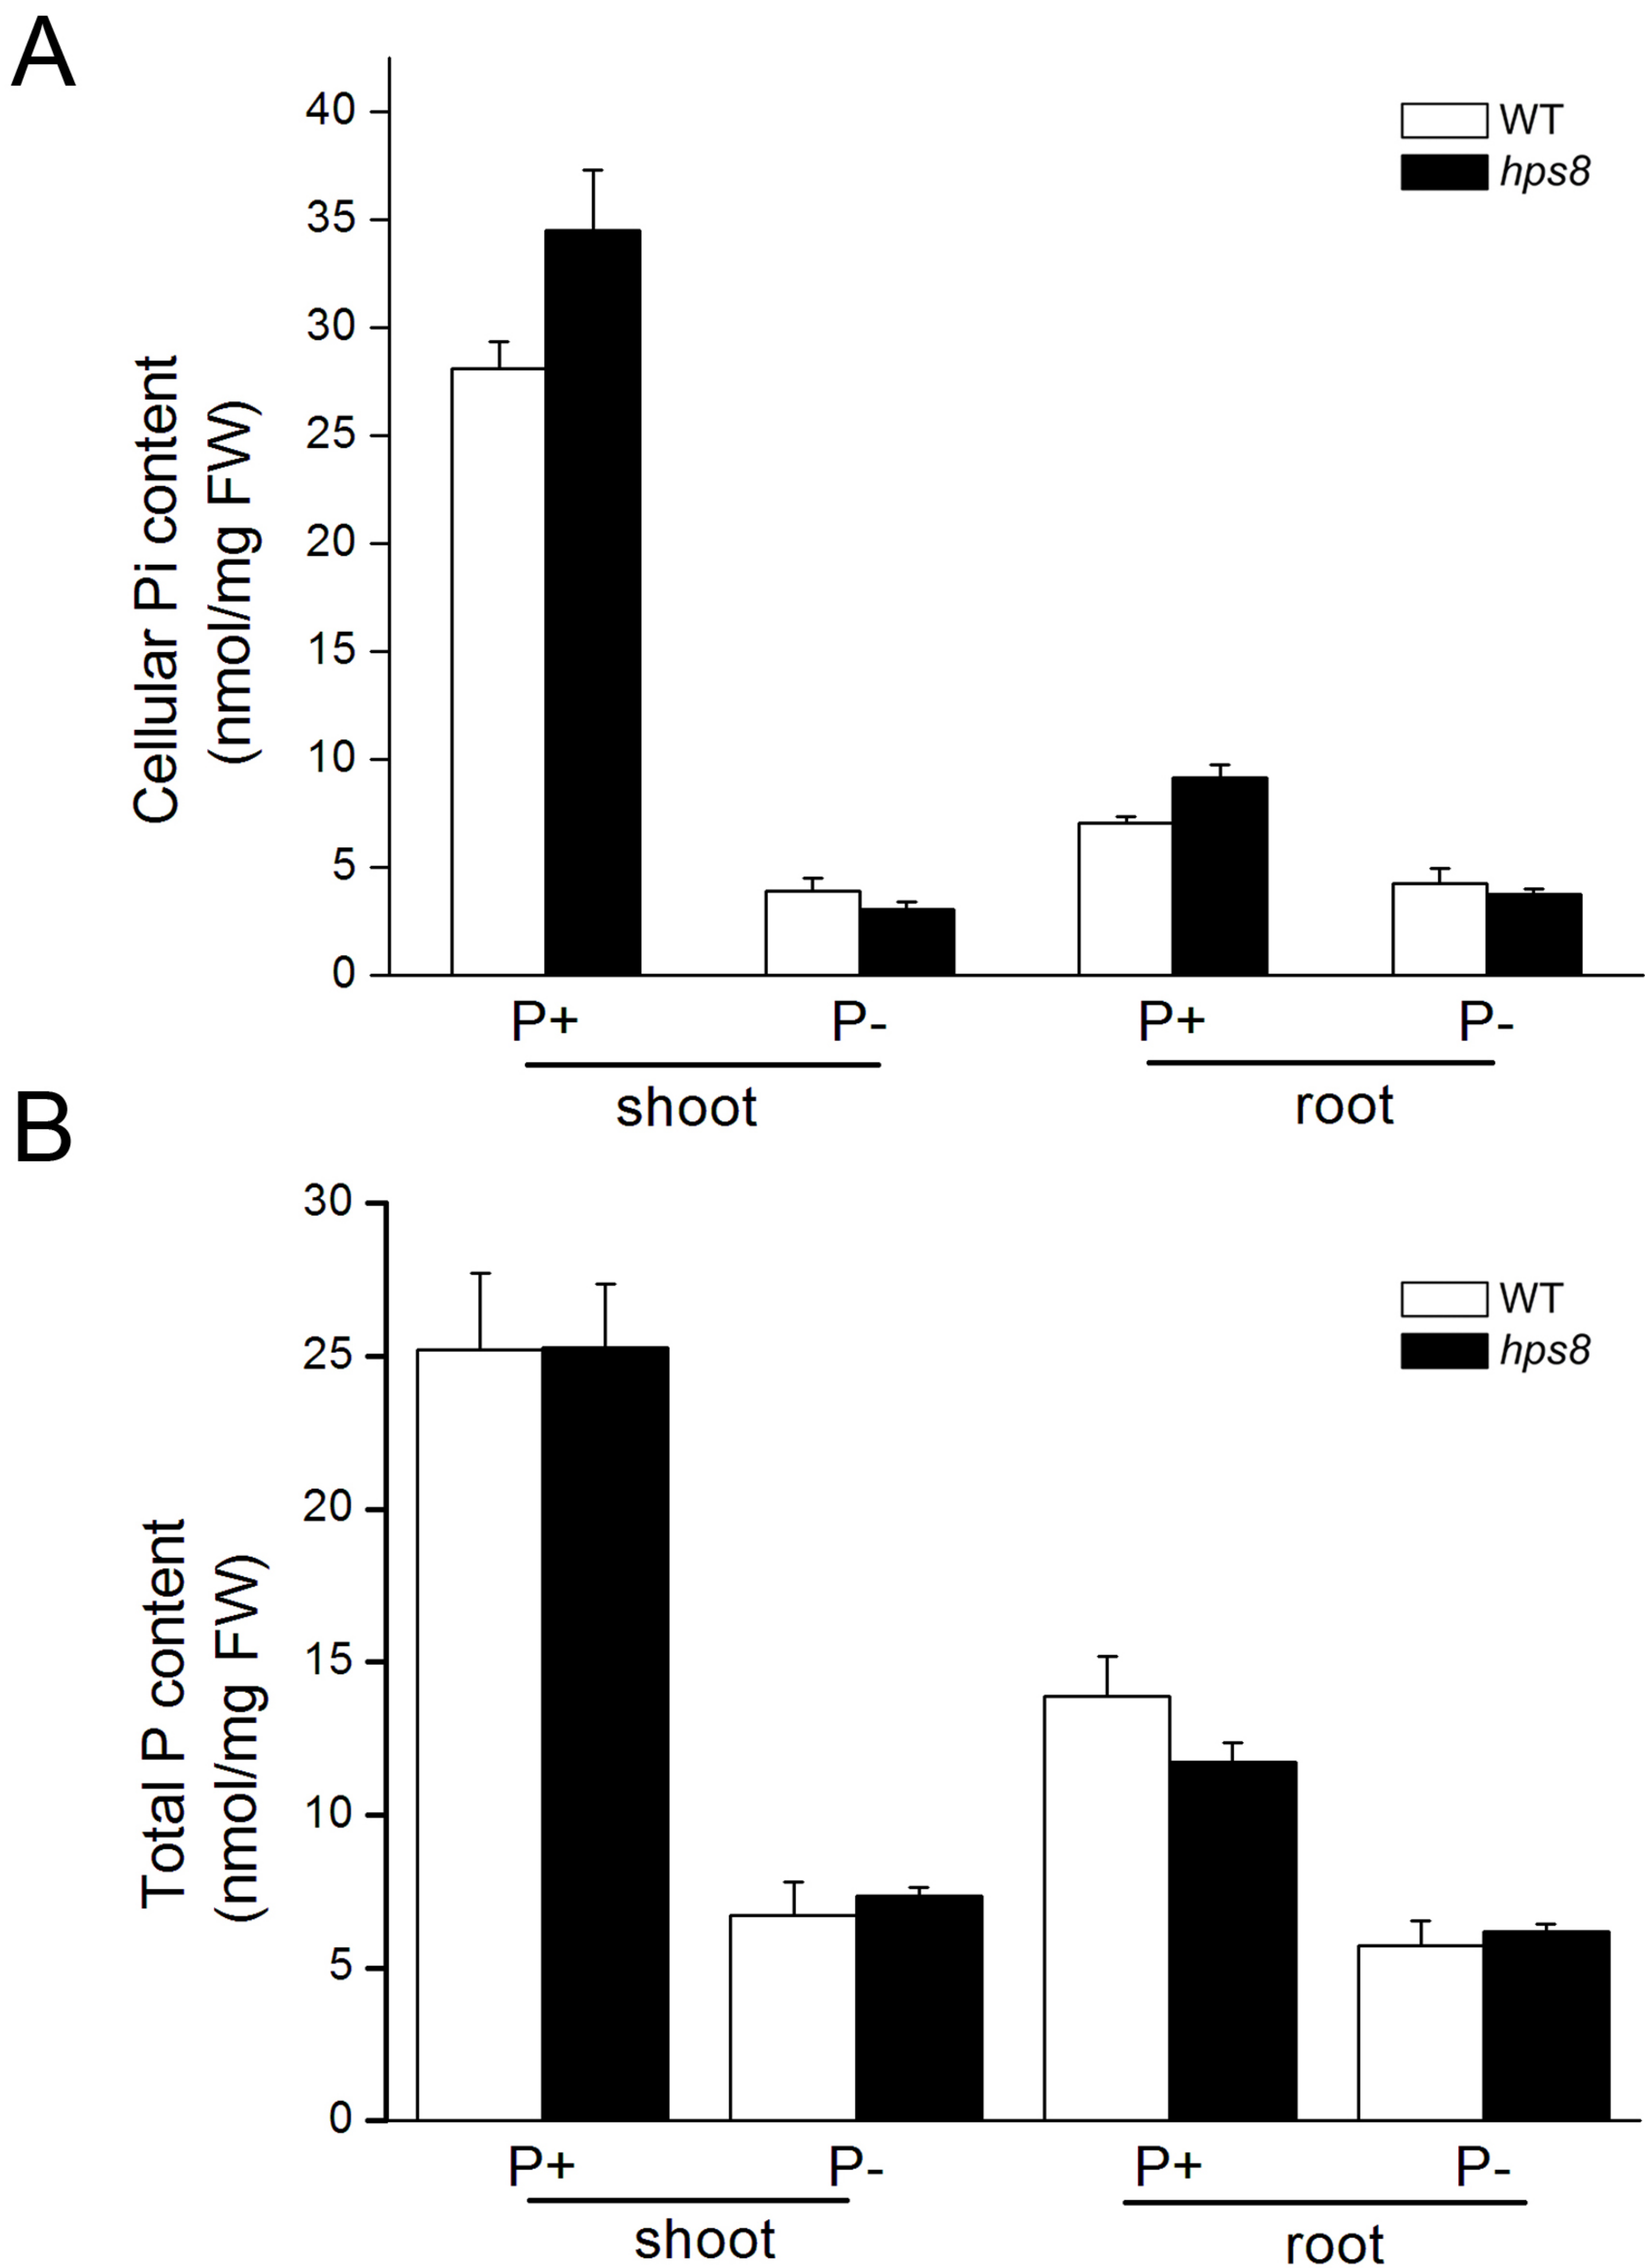

Figure S3. The contents of total P and cellular Pi in the WT and *hps8*. Total P (A) and Pi (B) contents in the shoots and roots of 8-day-old WT and *hps8* seedlings grown on P+ and P- media.
