# Supplementary material
Source: PubMed Central journal article supplement (PMC4972289)
Supplement: supp_pp.16.00680_PP2016-00680DR1_Supplemental_Materialfig4.pdf [file supp_pp.16.00680_PP2016-00680DR1_Supplemental_Materialfig4.pdf]

# Tao et al. Supplemental figure S4

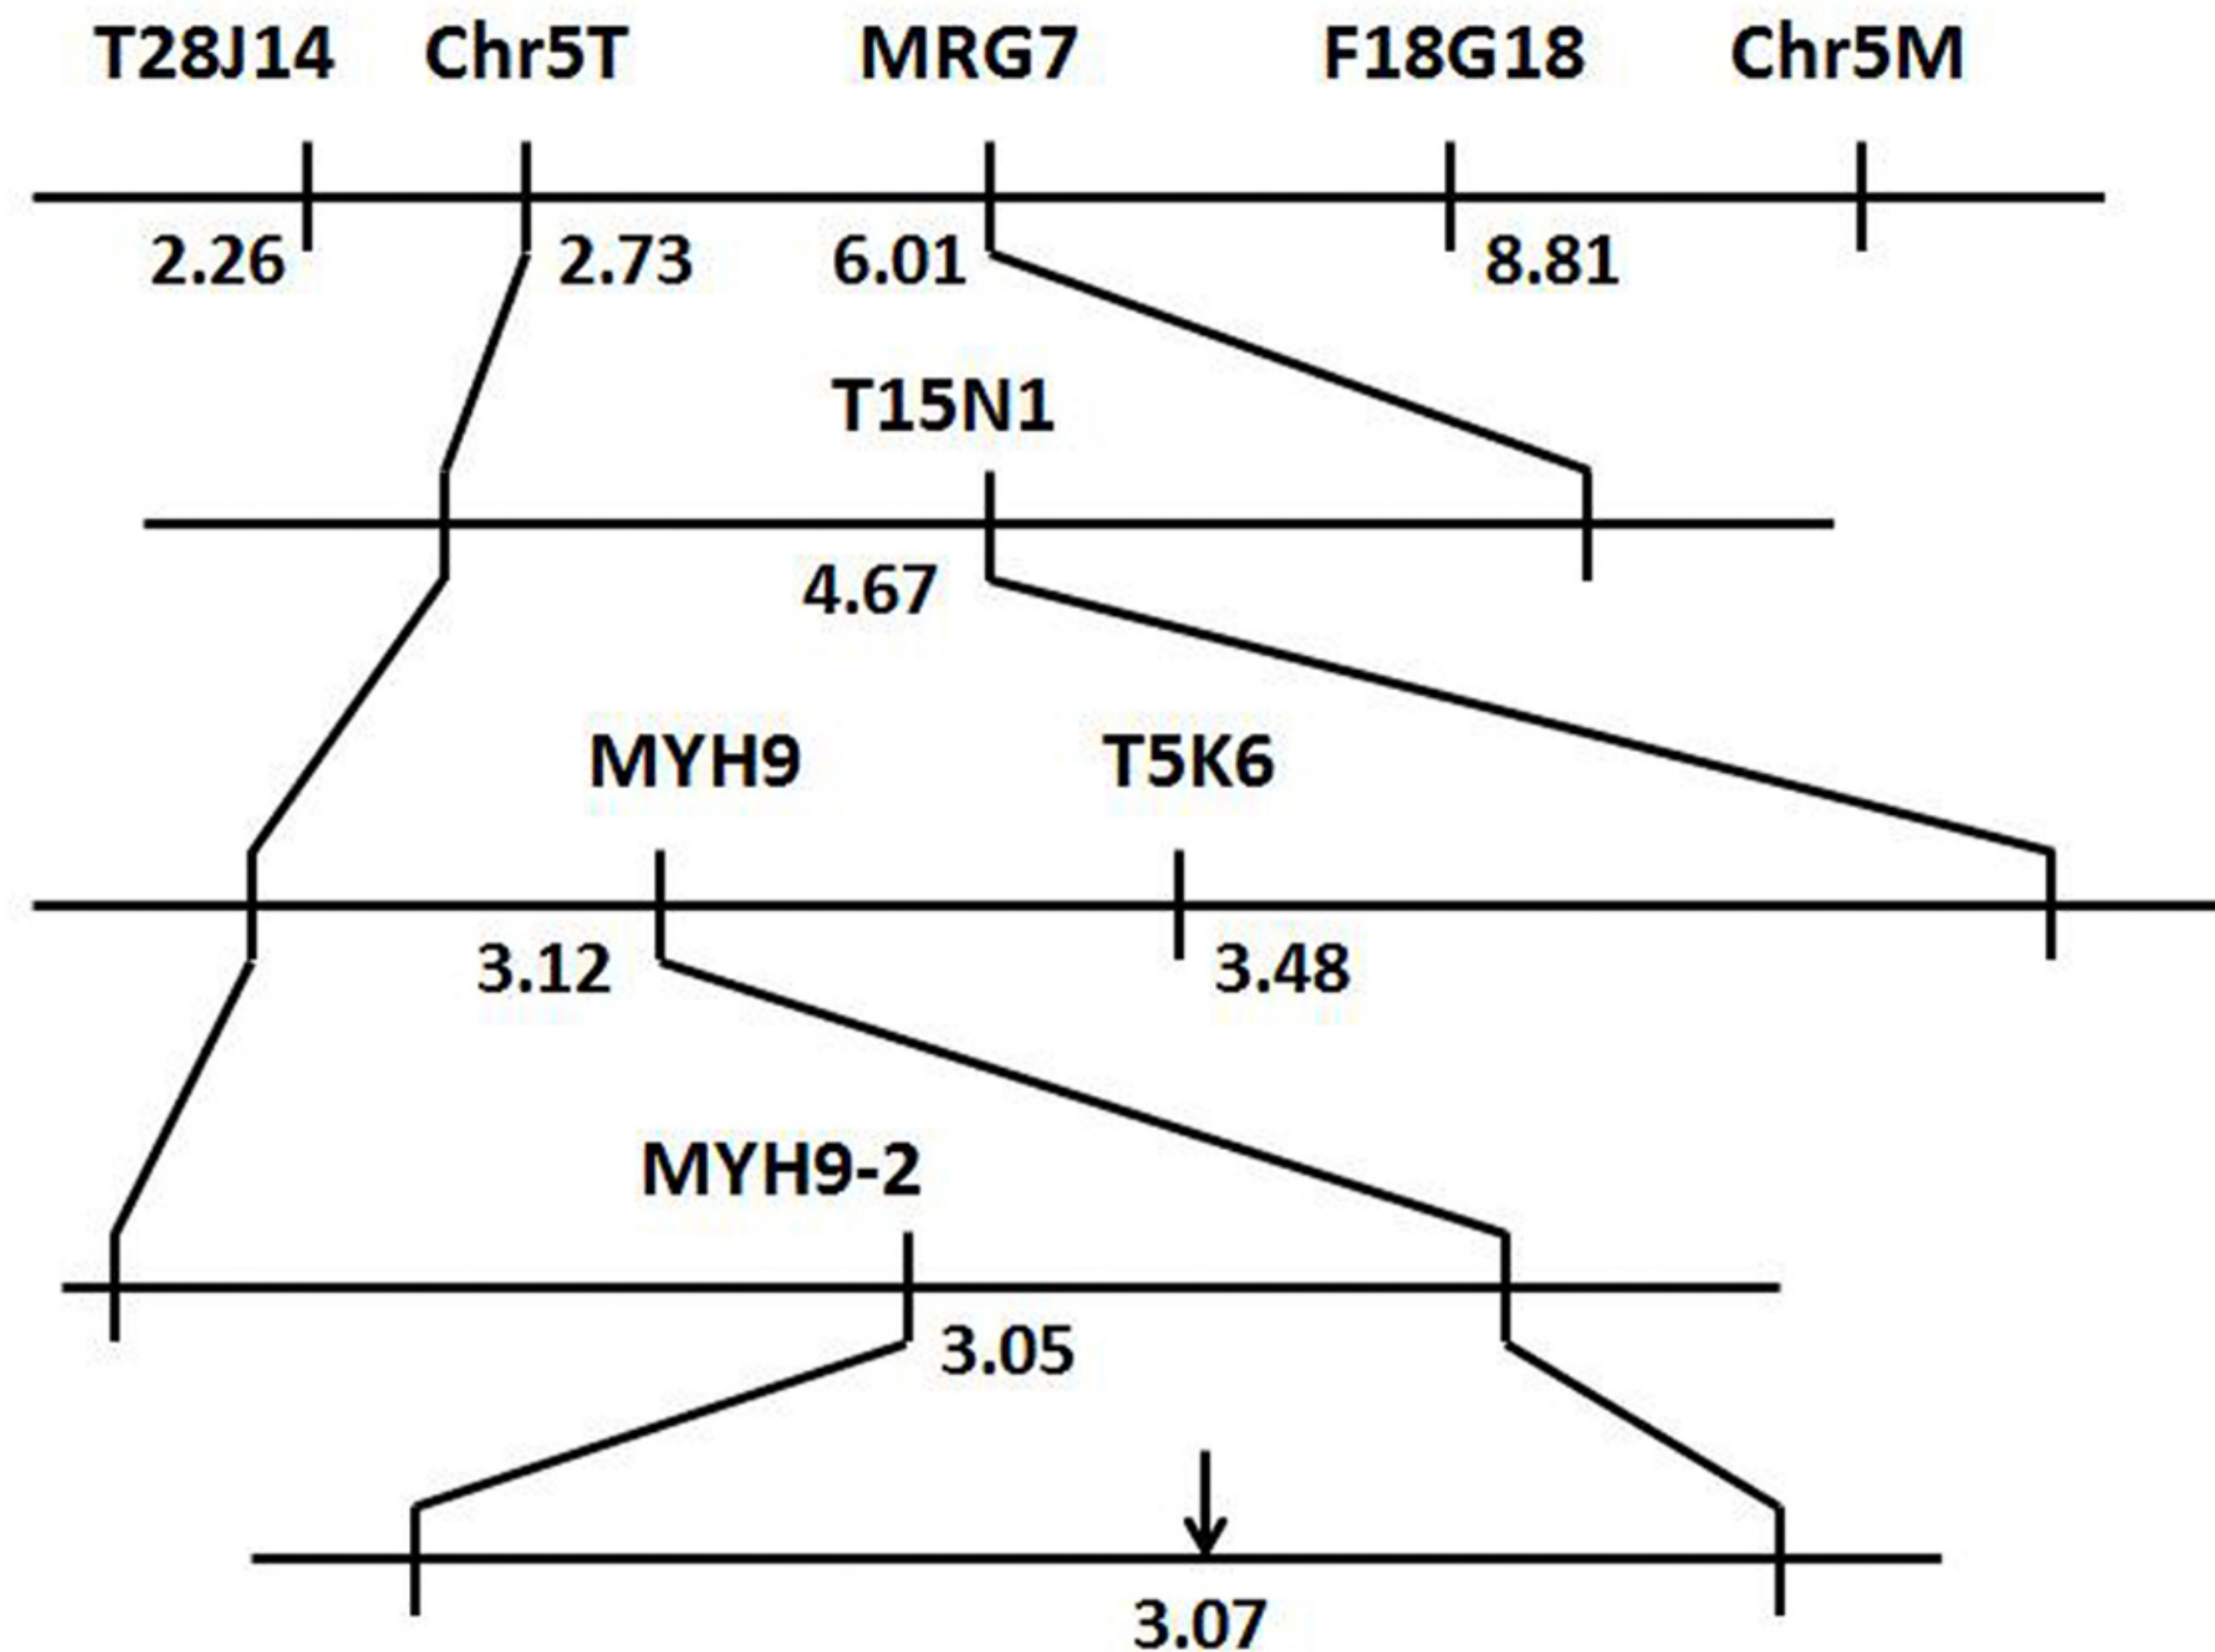

Figure S4. The mapping strategy for the *HPS8* gene. The molecular markers used in the fine mapping are shown above the horizontal lines. The numbers below each horizontal line are the AGI coordinates on the chromosome. Distance unit: Mb.
