# Supplementary material
Source: PubMed Central journal article supplement (PMC4972289)
Supplement: supp_pp.16.00680_PP2016-00680DR1_Supplemental_Materialfig5.pdf [file supp_pp.16.00680_PP2016-00680DR1_Supplemental_Materialfig5.pdf]

# Tao et al. Supplemental figure S5

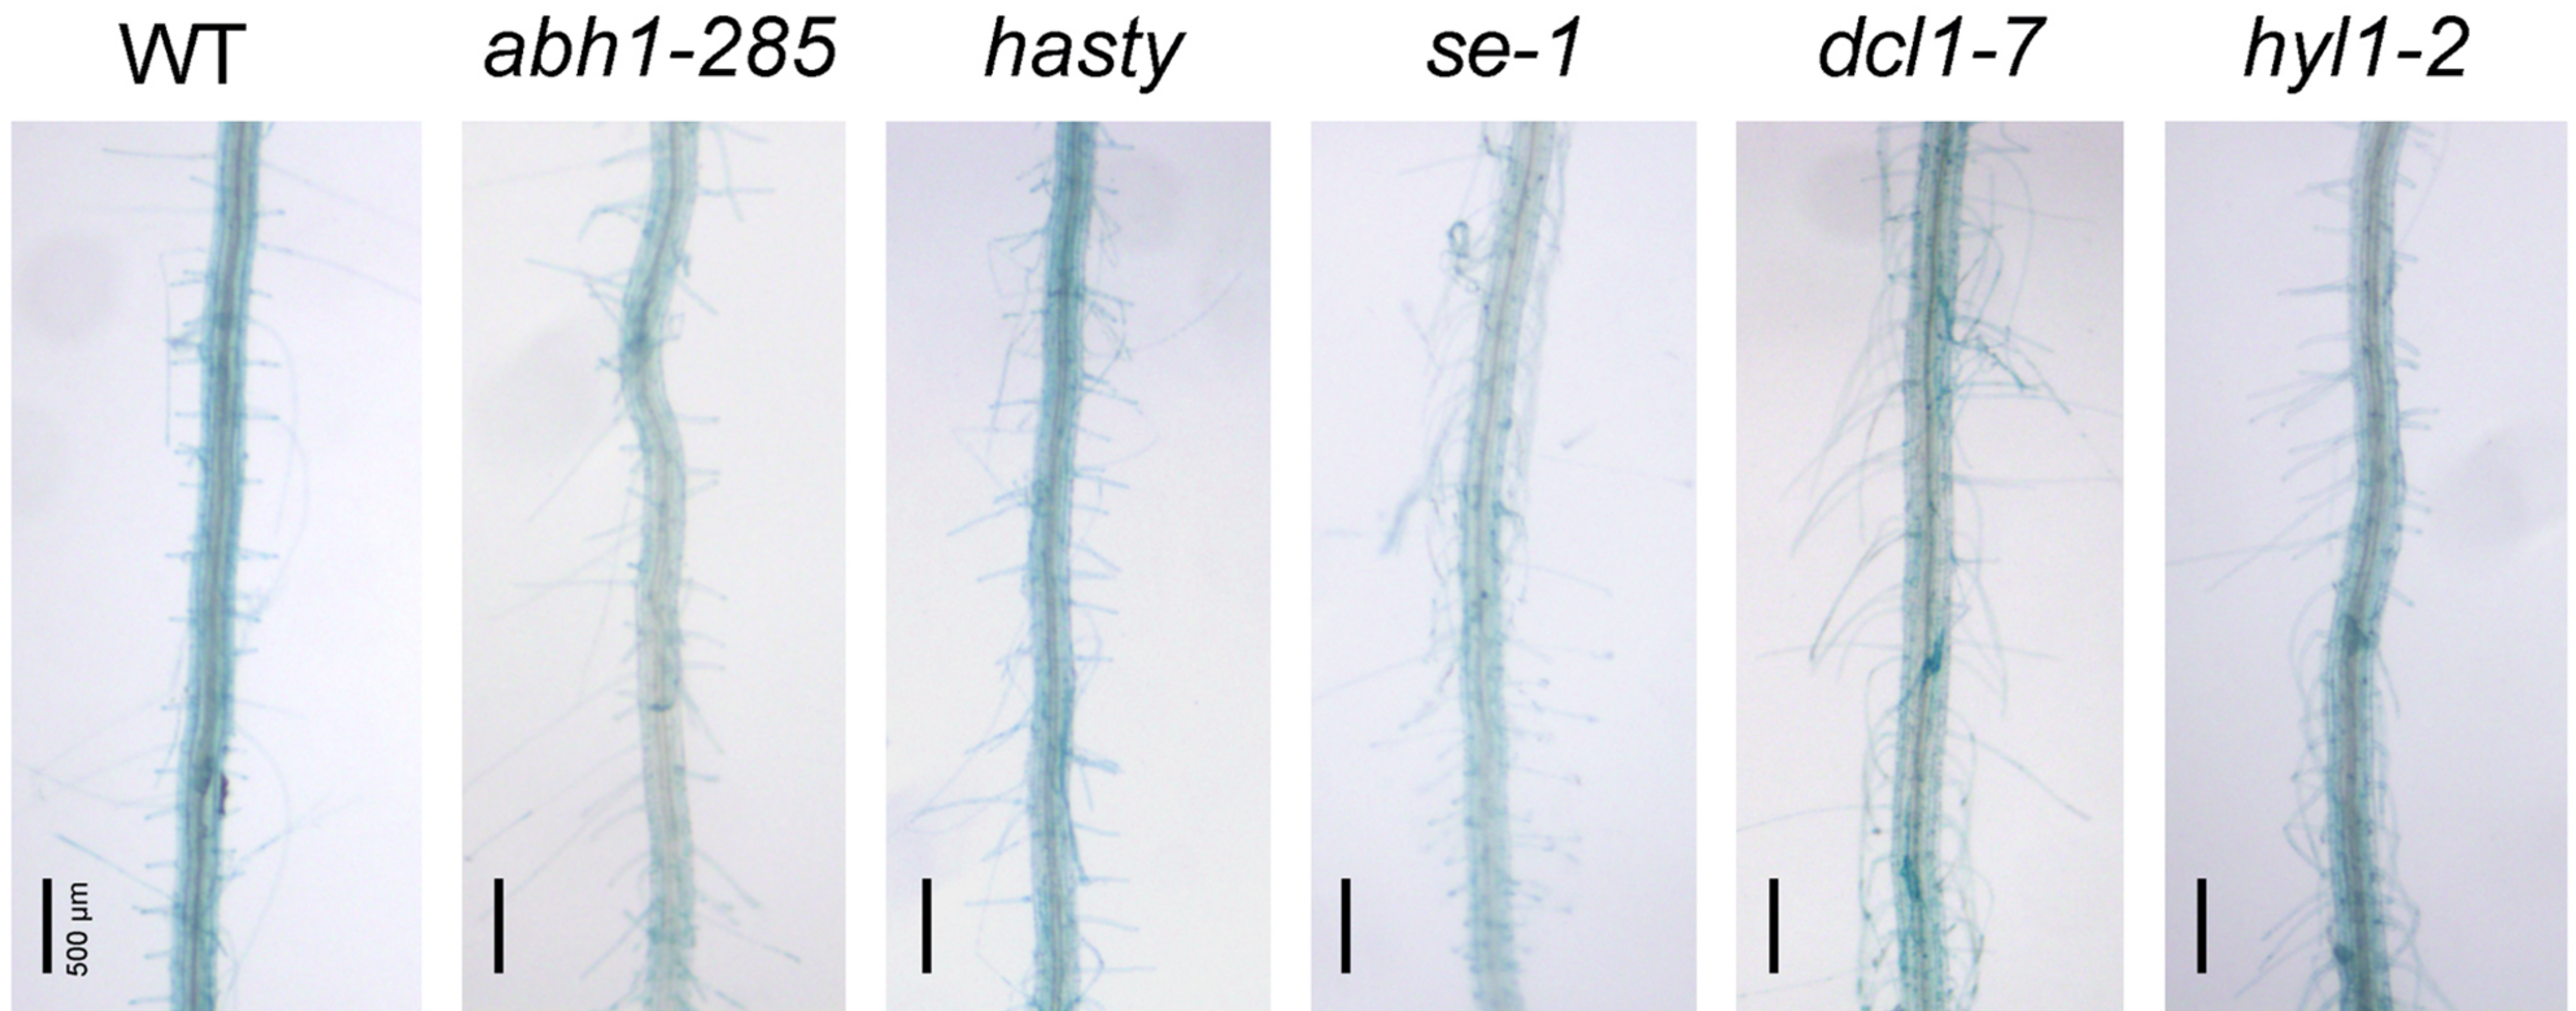

Figure S5. Histochemical staining of APase activities on the root surface of 8-day-old seedlings of the WT, *abh1-285*, *hasty*, *se-1*, *dcl1-7*, and *hyl1-2* grown on P- medium.
