# Supplementary material
Source: PubMed Central journal article supplement (PMC4972289)
Supplement: supp_pp.16.00680_PP2016-00680DR1_Supplemental_Materialtbl1.pdf [file supp_pp.16.00680_PP2016-00680DR1_Supplemental_Materialtbl1.pdf]

1 **Table S1.** The sequences and chromosomal locations of the primers used for molecular  
 2 mapping of the *HPS8* gene.

| Position on Chromosome 5 | Primer Names | Primer Sequence                 |
|--------------------------|--------------|---------------------------------|
| 2.20Mb                   | T28J14-F     | 5'-TAACGCCACGTCAGCAACAA-3'      |
|                          | T28J14-R     | 5'-TTCCACTGAGGCTGCGATTAA-3'     |
| 2.50Mb                   | MXM12-F      | 5'-ATGTGCTGCAATTTAGCAAC-3'      |
|                          | MXM12-R      | 5'-TCGGCCTTTCTCGGAATT-3'        |
| 2.73Mb                   | F8L15-F      | 5'-GTTTCGTTTTAGCTTAGTTGAGA-3'   |
|                          | F8L15-R      | 5'-ATTTCTCCCTACTCCACAACAC-3'    |
| 2.76Mb                   | MAH20-F      | 5'-CCACAAGAGGTTACTTACATTA-3'    |
|                          | MAH20-R      | 5'-CTCAGGTTATCAGGCTCACC-3'      |
| 3.0484Mb                 | MYH9-1-F     | 5'-GTTCTAACTAAAACGTGTGATTAAG-3' |
|                          | MYH9-1-R     | 5'-GAAACAAAAATTAACAAAAAGAT-3'   |
| 3.0793Mb                 | MYH9-2-F     | 5'-GCGATAACAATTCAAATAGTAACG-3'  |
|                          | MYH9-2-R     | 5'-ATGCGGTTCTAATAGTAACAA-3'     |
| 3.12Mb                   | MYH9-3-F     | 5'-GCAATAATACGAAAAGACGCG-3'     |
|                          | MYH9-3-R     | 5'-TCTGCTTCGTGAGAGCTAAGTG-3'    |
| 3.48Mb                   | T5K6-F       | 5'-CGACA ACACGCTTTT AGTAATTC-3' |
|                          | T5K6-R       | 5'-GAAGTTGAAGTAGGTGCTCAAAG-3'   |
| 4.05Mb                   | T24H18-F     | 5'-GTTTGAGTACGTGAAAAAGAGGC-3'   |
|                          | T24H18-R     | 5'-TACGCAGGACATGTTTCCTCTC-3'    |
| 4.67Mb                   | T15N1-F      | 5'-GTTCCAATGTGTTCCCAGAG-3'      |
|                          | T15N1-R      | 5'-GTACAGTCTAAAAGCGAGAGTATG-3'  |
| 6.01Mb                   | MRG7R-F      | 5'-AGAGAGGTAGCAGAGAGTACG-3'     |
|                          | MRG7R-R      | 5'-CAAAGTTGATGAGTGTATGGTC-3'    |
| 8.81Mb                   | F18G18-F     | 5'-TTGTGAAAGTGATGCAAATGT-3'     |
|                          | F18G18-R     | 5'-TGCTTCTAGAGCAATGGTACTC-3'    |

3

4

5
