# Supplementary material
Source: PubMed Central journal article supplement (PMC4972289)
Supplement: supp_pp.16.00680_PP2016-00680DR1_Supplemental_Materialtbl2.pdf [file supp_pp.16.00680_PP2016-00680DR1_Supplemental_Materialtbl2.pdf]

1

2 Table S2. Summary of the miRNA reads generated from miRNA-seq analysis

| Sample         | Raw reads  | Reads to be aligned | Reads aligned to TAIR9 |
|----------------|------------|---------------------|------------------------|
| P- WT          | 7,728,824  | 6,314,349 (81.70%)  | 5,171,403(81.90%)      |
| P- <i>hps8</i> | 15,872,004 | 13,516,271 (85.16%) | 10,694,969(79.13%)     |
| P+ WT          | 4,843,536  | 4,031,581 (83.24%)  | 3,429,963(85.08%)      |
| P+ <i>hps8</i> | 8,468,540  | 7,972,229 (94.14)   | 6,596,527(82.74%)      |
| Total          | 83,350,440 | 68,320,744 (81.97%) | 48,737,211(71.34%)     |
