# Supplementary material
Source: PubMed Central journal article supplement (PMC4972289)
Supplement: supp_pp.16.00680_PP2016-00680DR1_Supplemental_Materialtbl3.pdf [file supp_pp.16.00680_PP2016-00680DR1_Supplemental_Materialtbl3.pdf]

**Table S3.** Up-regulated miRNAs in the roots of Pi starved-WT plants and expression of the

| miRNA        | Col-Root P+ | Col-Root P- | <i>hps8</i> -Root P+ | <i>hps8</i> -Root P- |
|--------------|-------------|-------------|----------------------|----------------------|
| miR156g      | 8.269341353 | 27.85466256 | 9.08719911           | 12.48407902          |
| miR157d      | 36.57593291 | 81.31103704 | 32.38347319          | 74.80379609          |
| miR167d      | 4.134670677 | 8.602175203 | 0.991330812          | 5.436615059          |
| miR167b      | 1385.432728 | 4748.605526 | 470.8821357          | 1119.741346          |
| miR167a      | 1385.432728 | 4748.605526 | 470.8821357          | 1119.741346          |
| miR167c      | 104.9570249 | 210.1388514 | 57.3319653           | 135.109952           |
| miR171a      | 1.272206362 | 3.48183282  | 0.330443604          | 1.006780566          |
| miR172b-5p   | 1.590257953 | 5.734783469 | 1.486996218          | 2.11423919           |
| miR172e      | 30.85100428 | 70.25109749 | 10.40897353          | 35.64003205          |
| miR172d      | 5.724928629 | 13.51770389 | 3.800101446          | 11.77933263          |
| miR172c      | 5.724928629 | 13.51770389 | 3.800101446          | 11.77933263          |
| miR397b      | 47.38968699 | 198.2596571 | 58.15807431          | 544.3662523          |
| miR398c      | 74.74212377 | 217.102517  | 74.1845891           | 472.1800857          |
| miR398b      | 74.74212377 | 217.102517  | 74.1845891           | 472.1800857          |
| miR399a      | 1.272206362 | 61.64892229 | 1.486996218          | 107.2221303          |
| miR399b      | 9.541547715 | 280.5947626 | 8.095868298          | 375.2271171          |
| miR399c      | 9.541547715 | 280.5947626 | 8.095868298          | 375.2271171          |
| miR399f      | 20.35530179 | 3126.685873 | 42.79244672          | 4489.53658           |
| miR399d      | 1.908309543 | 140.7070087 | 3.469657842          | 206.4906942          |
| miR408       | 251.5788081 | 713.9805419 | 151.1779488          | 842.9773683          |
| miR447a.2-3p | 3.816619086 | 8.397361508 | 12.72207875          | 7.450176192          |
| miR779.2     | 0.318051591 | 2.662578039 | 3.469657842          | 1.409492793          |
| miR827       | 55.34097675 | 2700.8782   | 44.44466474          | 1074.033508          |
| miR833b      | 0.636103181 | 2.048136953 | 2.47832703           | 3.624410039          |
| miR834       | 0.318051591 | 2.252950649 | 1.156552614          | 0.90610251           |
| miR838       | 0.318051591 | 1.433695867 | 1.321774416          | 0.503390283          |
| miR839       | 24.48997247 | 63.49224555 | 18.17439822          | 17.31662574          |
| miR843       | 0.318051591 | 0.819254781 | 0.660887208          | 0.30203417           |
| miR852       | 0.954154772 | 2.252950649 | 1.321774416          | 1.610848906          |
| miR2111b-3p  | 0.954154772 | 17.20435041 | 0.165221802          | 7.651532305          |
| miR2111a-5p  | 4.770773858 | 481.312184  | 2.643548832          | 252.2992099          |
| miR2111b-5p  | 4.770773858 | 481.312184  | 2.643548832          | 252.2992099          |
| miR3440b-3p  | 0.636103181 | 1.843323258 | 2.643548832          | 0.704746397          |
| miR5012      | 0.636103181 | 1.433695867 | 1.321774416          | 2.11423919           |
| miR5629      | 3.180515905 | 10.85512585 | 6.278428476          | 12.68543514          |
| miR5642a     | 0.954154772 | 2.252950649 | 2.313105228          | 2.214917246          |
| miR5642b     | 0.954154772 | 2.252950649 | 2.313105228          | 2.214917246          |
| miR5650      | 2.862464315 | 6.55403825  | 5.617541268          | 3.322375869          |
| miR5651      | 17.17478589 | 36.04721038 | 12.22641335          | 21.54510412          |
| miR5652      | 0.318051591 | 0.819254781 | 0.82610901           | 0.30203417           |
| miR5653      | 0.318051591 | 1.024068477 | 1.156552614          | 0.402712227          |
| miR5656      | 0.318051591 | 1.228882172 | 1.982661624          | 1.107458623          |
| miR5663      | 0.318051591 | 1.843323258 | 0.82610901           | 0.503390283          |

se miRNAs in *hps8* under P+ and P- conditions. (Units of the number in the

| <u>log2(Col-Root_P-/Col-Root_P+)</u> | <u>log2(<i>hps8</i>-Root_P-/Col-Root_P-)</u> |
|--------------------------------------|----------------------------------------------|
| 1.7519                               | -1.157829444                                 |
| 1.15252                              | -0.12033971                                  |
| 1.05658                              | -0.661992834                                 |
| 1.77717                              | -2.084338398                                 |
| 1.77717                              | -2.084338398                                 |
| 1.00153                              | -0.637208973                                 |
| 1.45138                              | -1.79009766                                  |
| 1.84957                              | -1.439600413                                 |
| 1.18716                              | -0.97902213                                  |
| 1.23927                              | -0.198592313                                 |
| 1.23927                              | -0.198592313                                 |
| 2.06472                              | 1.45718649                                   |
| 1.53836                              | 1.120960744                                  |
| 1.53836                              | 1.120960744                                  |
| 5.59754                              | 0.798455125                                  |
| 4.87797                              | 0.419276012                                  |
| 4.87797                              | 0.419276012                                  |
| 7.26301                              | 0.52193225                                   |
| 6.2035                               | 0.553382574                                  |
| 1.50487                              | 0.239609142                                  |
| 1.13726                              | -0.172661553                                 |
| 3.06096                              | -0.91764771                                  |
| 5.60891                              | -1.330389577                                 |
| 1.68471                              | 0.823433993                                  |
| 2.81995                              | -1.314069531                                 |
| 2.16788                              | -1.509989741                                 |
| 1.37433                              | -1.874422564                                 |
| 1.36052                              | -1.439600413                                 |
| 1.23801                              | -0.483994532                                 |
| 4.1709                               | -1.168952823                                 |
| 6.6563                               | -0.931837256                                 |
| 6.6563                               | -0.931837256                                 |
| 1.53271                              | -1.387132993                                 |
| 1.17014                              | 0.560399587                                  |
| 1.77059                              | 0.224796555                                  |
| 1.23801                              | -0.024562914                                 |
| 1.23801                              | -0.024562914                                 |
| 1.19462                              | -0.980168794                                 |
| 1.06951                              | -0.742527546                                 |
| 1.36052                              | -1.439600413                                 |
| 1.68245                              | -1.346491008                                 |
| 1.94548                              | -0.150093796                                 |
| 2.53045                              | -1.87255982                                  |

e column 4-7 is RPM) (-): Target unknown.

---

target\_gene

---

AT5G38610:Invertase/pectin methylesterase inhibitor family protein

.

.

.

.

.

AT2G45160:Scarecrow transcription factor family protein||AT3G60630:Scarecrow transcription factor family

.

AT3G54990:SMZ (SCHLAFMUTZE)

AT4G36920:AP2 (APETALA 2)

AT4G36920:AP2 (APETALA 2)

.

.

.

AT2G33770:PHO2/UBC24 (PHOSPHATE 2)

.

.

.

.

AT2G02850:ARPN (PLANTACYANIN)

.

.

AT1G02860:SPX (SYG1/Pho81/XPR1)

.

.

.

.

.

.

.

.

.

.

.

.

.

.

.

.

.

.

.

.

.

.

.

.

.

.

.

.

.

.

.

.

protein||AT4G00150:Scarecrow-like transcription factor 6 (SCL6)
