# Supplementary material
Source: PubMed Central journal article supplement (PMC4972289)
Supplement: supp_pp.16.00680_PP2016-00680DR1_Supplemental_Materialtbl4.pdf [file supp_pp.16.00680_PP2016-00680DR1_Supplemental_Materialtbl4.pdf]

---

Supplementary Table S4. Sequences for the primers for qPCR analysis of mature miR399s

| Primer name (forward) | Sequence                    |
|-----------------------|-----------------------------|
| qPCR-miR399a          | 5'-TGCCAAAGGAGATTTGCCCTG-3' |
| qPCR-miR399b          | 5'-TGCCAAAGGAGAGTTGCCCTG-3' |
| qPCR-miR399f          | 5'-TGCCAAAGGAGATTTGCCCGG-3' |
| qPCR-snoR41Y          | 5'-GATGACGAGTCCGATGAAATC-3' |

1 Note: The sequence on the adaptor was used as reverse primers. snoR41Y-F  
2 was used as an internal control.

3
